# Supplementary material
Source: PubMed Central journal article supplement (PMC9141683)

# THE LANCET

## Diabetes & Endocrinology

### Supplementary appendix

This appendix formed part of the original submission and has been peer reviewed. We post it as supplied by the authors.

Supplement to: Valabhji J, Barron E, Gorton T, et al. Associations between reductions in routine care delivery and non-COVID-19-related mortality in people with diabetes in England during the COVID-19 pandemic: a population-based parallel cohort study. *Lancet Diabetes Endocrinol* 2022; published online May 27. [https://doi.org/10.1016/S2213-8587\(22\)00131-0](https://doi.org/10.1016/S2213-8587(22)00131-0).

## Supplementary Tables

### S1: Incidence rate ratios for the 2021 cohort compared to the 2019 cohort as a result of poisson regression analyses

| Covariates included in the model                                              | IRR   | 95% CI lower | 95% CI upper | p value |
|-------------------------------------------------------------------------------|-------|--------------|--------------|---------|
| Time period                                                                   | 1.026 | 1.009        | 1.043        | 0.003   |
| Time period, age, sex, ethnicity, socioeconomic deprivation and diabetes type | 1.023 | 1.006        | 1.040        | 0.007   |

**S2: Number and percentage of people who received all eight care processes and each individual care process and percentage change in 2020/21 compared to 2019/20 and in 2018/19 compared to 2017/18**

|                          | 2021 cohort |           |            |         |                   |              |              | 2019 cohort |           |            |         |                   |              |              |
|--------------------------|-------------|-----------|------------|---------|-------------------|--------------|--------------|-------------|-----------|------------|---------|-------------------|--------------|--------------|
|                          | Number      |           | Percentage |         | Percentage change |              |              | Number      |           | Percentage |         | Percentage change |              |              |
|                          | 2019/20     | 2020/21   | 2019/20    | 2020/21 | % change          | 95% CI lower | 95% CI upper | 2017/18     | 2018/19   | 2017/18    | 2018/19 | % change          | 95% CI lower | 95% CI upper |
| All eight care processes | 1,547,240   | 853,660   | 48.1%      | 26.5%   | -44.8%            | -45.0%       | -44.7%       | 1,437,740   | 1,370,315 | 48.3%      | 46.1%   | -4.7%             | -4.9%        | -4.5%        |
| HbA1c                    | 2,886,485   | 2,484,830 | 89.7%      | 77.2%   | -13.9%            | -14.1%       | -13.8%       | 2,743,140   | 2,737,110 | 92.2%      | 92.0%   | -0.2%             | -0.4%        | -0.1%        |
| Blood pressure           | 2,957,690   | 2,262,890 | 92.2%      | 70.5%   | -23.5%            | -23.6%       | -23.4%       | 2,780,115   | 2,778,140 | 93.8%      | 93.7%   | -0.1%             | -0.2%        | 0.1%         |
| Cholesterol              | 2,726,880   | 2,226,835 | 85.0%      | 69.4%   | -18.3%            | -18.5%       | -18.2%       | 2,613,765   | 2,610,580 | 88.2%      | 88.1%   | -0.1%             | -0.3%        | 0.0%         |
| Serum creatinine         | 2,810,040   | 2,469,510 | 87.6%      | 77.0%   | -12.1%            | -12.3%       | -12.0%       | 2,694,140   | 2,689,150 | 90.9%      | 90.7%   | -0.2%             | -0.4%        | 0.0%         |
| Urine albumin            | 1,984,900   | 1,403,250 | 61.9%      | 43.7%   | -29.3%            | -29.5%       | -29.2%       | 1,779,270   | 1,675,895 | 60.0%      | 56.5%   | -5.8%             | -6.0%        | -5.6%        |
| Foot surveillance        | 2,494,870   | 1,558,640 | 77.8%      | 48.6%   | -37.5%            | -37.7%       | -37.4%       | 2,419,665   | 2,442,855 | 81.6%      | 82.4%   | 1.0%              | 0.8%         | 1.1%         |
| BMI                      | 2,680,050   | 1,941,825 | 83.5%      | 60.5%   | -27.5%            | -27.7%       | -27.4%       | 2,478,030   | 2,500,985 | 83.6%      | 84.4%   | 0.9%              | 0.7%         | 1.1%         |
| Smoking                  | 2,634,990   | 2,038,850 | 82.1%      | 63.6%   | -22.6%            | -22.8%       | -22.5%       | 2,424,320   | 2,452,995 | 81.8%      | 82.8%   | 1.2%              | 1.0%         | 1.4%         |

**S3: Percentage of people who received all eight care processes by deprivation and ethnicity in the 2021 cohort and 2019 cohort**

|             |                        | 2021 cohort                                             |                                                         |                                                         |                                                         |                                                  | 2019 cohort                                             |                                                         |                                                         |                                                         |                                                  |
|-------------|------------------------|---------------------------------------------------------|---------------------------------------------------------|---------------------------------------------------------|---------------------------------------------------------|--------------------------------------------------|---------------------------------------------------------|---------------------------------------------------------|---------------------------------------------------------|---------------------------------------------------------|--------------------------------------------------|
|             |                        | Number who received all eight care processes in 2020/21 | Number who received all eight care processes in 2019/20 | Percentage received all eight care processes in 2020/21 | Percentage received all eight care processes in 2019/20 | Percentage change in 2020/21 compared to 2019/20 | Number who received all eight care processes in 2018/19 | Number who received all eight care processes in 2017/18 | Percentage received all eight care processes in 2018/19 | Percentage received all eight care processes in 2017/18 | Percentage change in 2018/19 compared to 2017/18 |
| Overall     |                        | 853,660                                                 | 1,547,240                                               | 26.5%                                                   | 48.1%                                                   | -44.8%                                           | 1,370,315                                               | 1,437,740                                               | 46.1%                                                   | 48.3%                                                   | -4.7%                                            |
| Deprivation | IMD 1 (most deprived)  | 191,770                                                 | 362,390                                                 | 25.3%                                                   | 47.5%                                                   | -47.1%                                           | 318,010                                                 | 332,175                                                 | 45.0%                                                   | 47.0%                                                   | -4.3%                                            |
|             | IMD 2                  | 188,700                                                 | 340,950                                                 | 26.5%                                                   | 47.9%                                                   | -44.7%                                           | 295,560                                                 | 307,890                                                 | 45.3%                                                   | 47.1%                                                   | -4.0%                                            |
|             | IMD 3                  | 178,420                                                 | 318,825                                                 | 26.9%                                                   | 48.1%                                                   | -44.0%                                           | 279,855                                                 | 294,945                                                 | 46.0%                                                   | 48.5%                                                   | -5.1%                                            |
|             | IMD 4                  | 157,555                                                 | 284,560                                                 | 26.7%                                                   | 48.2%                                                   | -44.6%                                           | 254,180                                                 | 271,055                                                 | 46.4%                                                   | 49.5%                                                   | -6.2%                                            |
|             | IMD 5 (least deprived) | 137,050                                                 | 240,200                                                 | 27.9%                                                   | 49.0%                                                   | -42.9%                                           | 222,385                                                 | 231,325                                                 | 48.7%                                                   | 50.6%                                                   | -3.9%                                            |
| Ethnicity   | Non-white              | 210,255                                                 | 344,565                                                 | 30.7%                                                   | 50.3%                                                   | -39.0%                                           | 279,810                                                 | 275,305                                                 | 46.8%                                                   | 46.0%                                                   | 1.6%                                             |
|             | White                  | 578,135                                                 | 1,072,995                                               | 25.7%                                                   | 47.8%                                                   | -46.1%                                           | 934,255                                                 | 992,030                                                 | 46.2%                                                   | 49.1%                                                   | -5.8%                                            |

**S4: Characteristics of participants by eight care processes group in the 2021 cohort and 2019 cohort**

|               |                        | Not received 8 CPs in both years |                     | Received all 8 CPs in both years |                     | Received in the first but not in the second year |                     | Received in the second but not in the first year |                     |
|---------------|------------------------|----------------------------------|---------------------|----------------------------------|---------------------|--------------------------------------------------|---------------------|--------------------------------------------------|---------------------|
|               |                        | 2020/21 and 2019/20              | 2018/19 and 2017/18 | 2020/21 and 2019/20              | 2018/19 and 2017/18 | 2020/21 and 2019/20                              | 2018/19 and 2017/18 | 2020/21 and 2019/20                              | 2018/19 and 2017/18 |
| Total         |                        | 1,376,270                        | 1,018,855           | 558,595                          | 853,260             | 988,645                                          | 584,480             | 295,060                                          | 517,050             |
| Diabetes type | Type 1 diabetes        | 10%                              | 12%                 | 5%                               | 5%                  | 6%                                               | 7%                  | 7%                                               | 7%                  |
|               | Type 2 diabetes        | 87%                              | 87%                 | 95%                              | 95%                 | 94%                                              | 93%                 | 92%                                              | 92%                 |
|               | other                  | 3%                               | 1%                  | 0%                               | 0%                  | 1%                                               | 1%                  | 1%                                               | 1%                  |
| Age           | <40                    | 10%                              | 11%                 | 3%                               | 3%                  | 4%                                               | 5%                  | 6%                                               | 6%                  |
|               | 40-44                  | 5%                               | 5%                  | 3%                               | 3%                  | 3%                                               | 3%                  | 4%                                               | 4%                  |
|               | 45-49                  | 7%                               | 8%                  | 5%                               | 5%                  | 5%                                               | 6%                  | 7%                                               | 7%                  |
|               | 50-54                  | 10%                              | 10%                 | 8%                               | 7%                  | 8%                                               | 9%                  | 10%                                              | 10%                 |
|               | 55-59                  | 12%                              | 11%                 | 11%                              | 10%                 | 11%                                              | 11%                 | 13%                                              | 12%                 |
|               | 60-64                  | 12%                              | 11%                 | 13%                              | 13%                 | 13%                                              | 13%                 | 13%                                              | 13%                 |
|               | 65-69                  | 11%                              | 11%                 | 15%                              | 15%                 | 14%                                              | 14%                 | 13%                                              | 13%                 |
|               | 70-74                  | 11%                              | 10%                 | 16%                              | 17%                 | 15%                                              | 14%                 | 13%                                              | 13%                 |
| 75+           | 23%                    | 23%                              | 26%                 | 28%                              | 28%                 | 25%                                              | 21%                 | 23%                                              |                     |
| Sex           | Male                   | 54%                              | 53%                 | 58%                              | 59%                 | 57%                                              | 55%                 | 57%                                              | 57%                 |
|               | Female                 | 46%                              | 47%                 | 42%                              | 41%                 | 43%                                              | 45%                 | 43%                                              | 43%                 |
| Ethnicity     | Asian                  | 12%                              | 13%                 | 16%                              | 12%                 | 13%                                              | 12%                 | 15%                                              | 14%                 |
|               | Black                  | 4%                               | 4%                  | 6%                               | 4%                  | 5%                                               | 4%                  | 5%                                               | 5%                  |
|               | Mixed                  | 1%                               | 1%                  | 1%                               | 1%                  | 1%                                               | 1%                  | 1%                                               | 1%                  |
|               | Other                  | 2%                               | 2%                  | 2%                               | 2%                  | 2%                                               | 2%                  | 2%                                               | 2%                  |
|               | Unknown                | 10%                              | 12%                 | 7%                               | 12%                 | 9%                                               | 12%                 | 8%                                               | 11%                 |
|               | White                  | 70%                              | 67%                 | 67%                              | 69%                 | 71%                                              | 69%                 | 69%                                              | 67%                 |
| Deprivation   | IMD 1 (most deprived)  | 24%                              | 25%                 | 23%                              | 23%                 | 24%                                              | 24%                 | 22%                                              | 24%                 |
|               | IMD 2                  | 22%                              | 23%                 | 22%                              | 21%                 | 22%                                              | 22%                 | 22%                                              | 22%                 |
|               | IMD 3                  | 21%                              | 20%                 | 21%                              | 20%                 | 20%                                              | 21%                 | 21%                                              | 21%                 |
|               | IMD 4                  | 18%                              | 18%                 | 18%                              | 19%                 | 18%                                              | 19%                 | 19%                                              | 18%                 |
|               | IMD 5 (least deprived) | 15%                              | 14%                 | 16%                              | 17%                 | 15%                                              | 15%                 | 17%                                              | 15%                 |

**S5: Rates of mortality per 100,000 people with diabetes between weeks 27 and 41 in 2021 and 2019 in each eight care process group in the 2021 cohort and 2019 cohort**

|               |                        | Not received 8 CPs in both years |                     | Received all 8 CPs in both years |                     | Received in the first but not in the second year |                     | Received in the second but not in the first year |                     |
|---------------|------------------------|----------------------------------|---------------------|----------------------------------|---------------------|--------------------------------------------------|---------------------|--------------------------------------------------|---------------------|
|               |                        | 2020/21 and 2019/20              | 2018/19 and 2017/18 | 2020/21 and 2019/20              | 2018/19 and 2017/18 | 2020/21 and 2019/20                              | 2018/19 and 2017/18 | 2020/21 and 2019/20                              | 2018/19 and 2017/18 |
| Total         |                        | 1,206*                           | 1,292               | 530*                             | 611                 | 900                                              | 884                 | 564*                                             | 695                 |
| Diabetes type | Type 1 diabetes        | 412                              | 456                 | 235                              | 314                 | 480                                              | 385                 | 255                                              | 271                 |
|               | Type 2 diabetes        | 1,307*                           | 1,410               | 545*                             | 627                 | 927                                              | 922                 | 588*                                             | 729                 |
|               | other                  | 956                              | 753                 | 365                              | 407                 | 681                                              | 560                 | 534                                              | 565                 |
| Age           | <40                    | 69                               | Suppressed          | Suppressed                       | Suppressed          | 50                                               | Suppressed          | Suppressed                                       | Suppressed          |
|               | 40-44                  | 137                              | Suppressed          | Suppressed                       | Suppressed          | 69                                               | Suppressed          | Suppressed                                       | Suppressed          |
|               | 45-49                  | 211                              | 206                 | 95                               | 67                  | 116                                              | 108                 | 76                                               | 67                  |
|               | 50-54                  | 277                              | 274                 | 89                               | 118                 | 155                                              | 148                 | 129                                              | 143                 |
|               | 55-59                  | 378                              | 369                 | 135                              | 142                 | 225                                              | 262                 | 220                                              | 187                 |
|               | 60-64                  | 498                              | 535                 | 248                              | 235                 | 361                                              | 362                 | 319                                              | 315                 |
|               | 65-69                  | 840                              | 922                 | 348                              | 417                 | 543                                              | 579                 | 464                                              | 541                 |
|               | 70-74                  | 1,251                            | 1,354               | 529                              | 587                 | 886                                              | 893                 | 656                                              | 745                 |
| 75+           | 3,530*                 | 3,929                            | 1,278*              | 1,399                            | 2,185*              | 2,329                                            | 1,586*              | 1,913                                            |                     |
| Sex           | Male                   | 1,132*                           | 1,212               | 590*                             | 657                 | 921                                              | 930                 | 601*                                             | 719                 |
|               | Female                 | 1,293*                           | 1,382               | 448*                             | 544                 | 871                                              | 827                 | 516*                                             | 664                 |
| Ethnicity     | Asian                  | 521                              | 538                 | 238                              | 282                 | 381                                              | 380                 | 269                                              | 307                 |
|               | Black                  | 683                              | 742                 | 331                              | 308                 | 541                                              | 497                 | 286                                              | 343                 |
|               | Mixed                  | 627                              | 731                 | 294                              | 337                 | 435                                              | 323                 | 232                                              | 416                 |
|               | Other                  | 655                              | 667                 | 218                              | 368                 | 511                                              | 668                 | 231                                              | 426                 |
|               | Unknown                | 1,084*                           | 1,233               | 525                              | 591                 | 847                                              | 776                 | 501                                              | 648                 |
|               | White                  | 1,400*                           | 1,508               | 633*                             | 700                 | 1,042                                            | 1,030               | 670*                                             | 827                 |
| Deprivation   | IMD 1 (most deprived)  | 1,174                            | 1,226               | 486*                             | 570                 | 871                                              | 873                 | 595                                              | 651                 |
|               | IMD 2                  | 1,155*                           | 1,279               | 508*                             | 619                 | 898                                              | 830                 | 516*                                             | 670                 |
|               | IMD 3                  | 1,244                            | 1,309               | 548                              | 627                 | 881                                              | 922                 | 566*                                             | 731                 |
|               | IMD 4                  | 1,265                            | 1,356               | 592                              | 620                 | 943                                              | 904                 | 575*                                             | 727                 |
|               | IMD 5 (least deprived) | 1,211*                           | 1,319               | 529*                             | 625                 | 919                                              | 902                 | 572*                                             | 717                 |

\*Non-overlapping confidence intervals compared to previous years

**S6: Interactions between annual eight care process group and deprivation and ethnicity in the 2021 cohort**

| Interaction                              | Wald test | P value |
|------------------------------------------|-----------|---------|
| Eight care process group and deprivation | 16.03     | 0.1901  |
| Eight care process group and ethnicity   | 17.14     | 0.3107  |

**S7: Observed and estimated number of deaths and rate of mortality per 100,000 population between weeks 27 and 41 in 2021**

|          | Number of deaths | Rate per 100,000 | 95% CI lower | 95% CI upper |
|----------|------------------|------------------|--------------|--------------|
| Observed | 30,118           | 936              | 925          | 946          |
| Expected | 27,043           | 840              | 830          | 850          |



**S8: Causes of death between weeks 27 and 41 in 2021 and 2019**

| Cause of death                                 | Number of deaths |        | Percentage increase |
|------------------------------------------------|------------------|--------|---------------------|
|                                                | 2021             | 2019   |                     |
| Diseases of the circulatory system             | 9,035            | 7,859  | 15.0%               |
| Neoplasms                                      | 7,694            | 7,261  | 6.0%                |
| Diseases of the respiratory system             | 3,232            | 3,102  | 4.2%                |
| Mental and behavioural disorders               | 2,246            | 2,151  | 4.4%                |
| Endocrine, nutritional, and metabolic diseases | 1,836            | 1,595  | 15.1%               |
| Diseases of the nervous system                 | 1,656            | 1,410  | 17.4%               |
| Diseases of the digestive system               | 1,632            | 1,389  | 17.5%               |
| Other                                          | 2,787            | 2,365  | 17.8%               |
| Total                                          | 30,118           | 27,132 | 11.0%               |

**S9a: Sensitivity analyses: Number of non-COVID-19-related deaths for people with diabetes between weeks 27 and 50 in 2021 and 2019**

|      | Number of deaths | Rate per 100,000 | 95% CI lower | 95% CI upper |
|------|------------------|------------------|--------------|--------------|
| 2021 | 50,539           | 1,570            | 1,557        | 1,584        |
| 2019 | 46,049           | 1,549            | 1,534        | 1,563        |

**S9b: Sensitivity analyses: Incidence rate ratios for the 2021 cohort compared to the 2019 cohort as a result of poisson regression analyses for non-COVID-19-related deaths for people with diabetes between weeks 27 and 50 in 2021 and 2019**

| Covariates included in the model                                              | IRR   | 95% CI lower | 95% CI upper | p value |
|-------------------------------------------------------------------------------|-------|--------------|--------------|---------|
| Time period                                                                   | 1.014 | 1.001        | 1.027        | 0.031   |
| Time period, age, sex, ethnicity, socioeconomic deprivation and diabetes type | 1.011 | 0.998        | 1.024        | 0.089   |

**S10: Sensitivity analyses: Adjusted odds ratios for non-COVID-19-related deaths for people with diabetes between weeks 27 and 50 in 2021 and 2019**

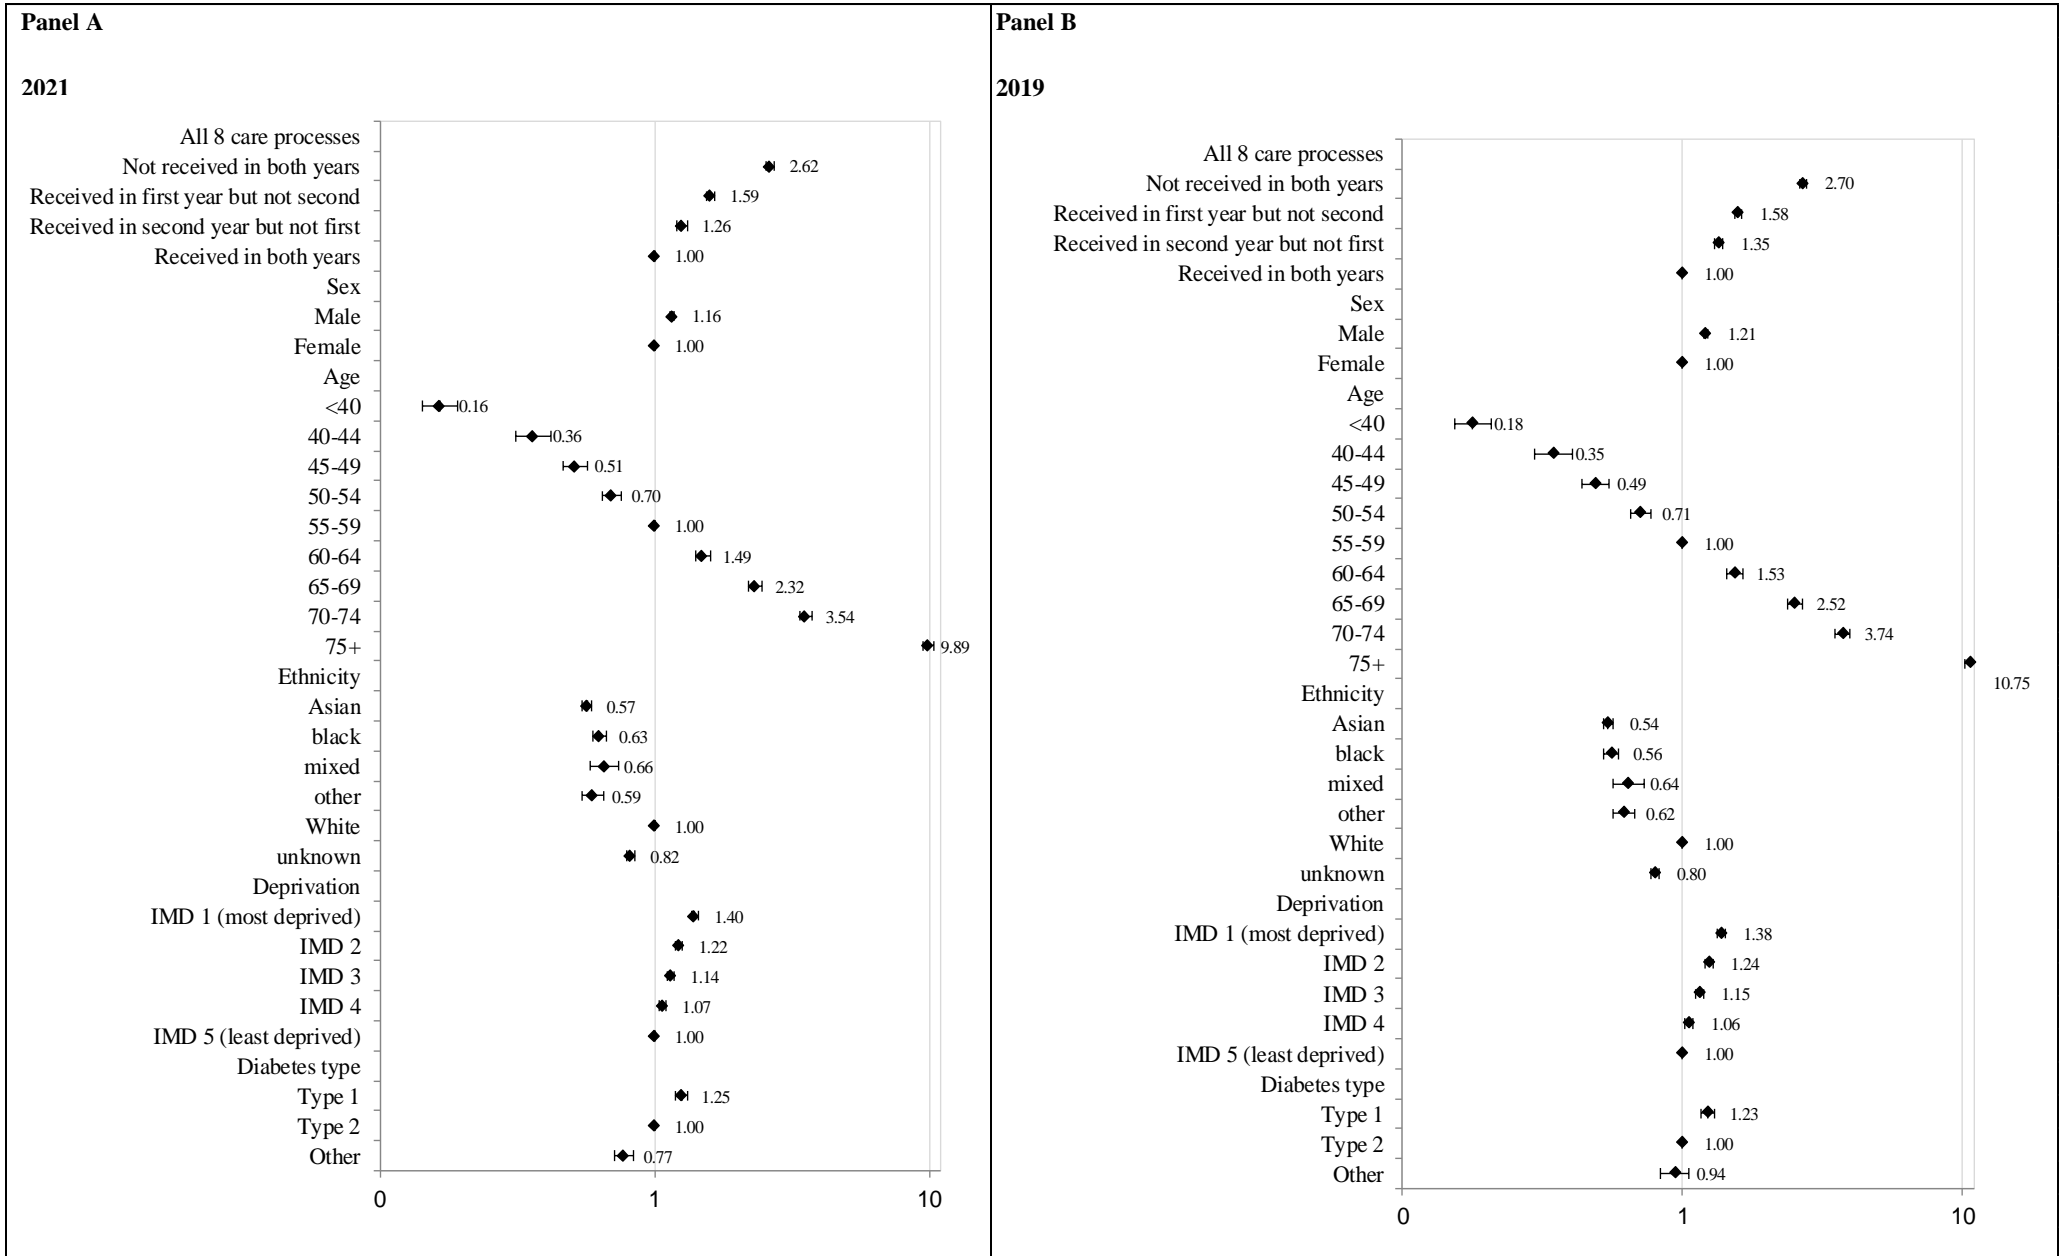

Supplement: mmc1.pdf [file mmc1.pdf]
